# Supplementary material for: Concept for estimating mitochondrial DNA haplogroups using a maximum likelihood approach (EMMA)
Source: PubMed Central journal article supplement — Forensic Sci Int Genet. 2013 Dec;7(6):601–9. doi: 10.1016/j.fsigen.2013.07.005 (PMC3819997; doi:10.1016/j.fsigen.2013.07.005), 2013-12
Supplement: mmc1.pdf [file mmc1.pdf]

**ESM1: 31 mtGenomes rejected in the first step that were again added to the EMMA database**

| <b>Accession number</b> | <b>Original publication</b> | <b>Haplogroup in Phylotree Build 15</b> | <b>Initial reason for exclusion from EMMA</b> |
|-------------------------|-----------------------------|-----------------------------------------|-----------------------------------------------|
| AF346973                | Ingman et al. 2000          | F4a1                                    | highlighted as problematic in Yao et al. 2009 |
| DQ523642                | Fraumene et al. 2006        | X2b3                                    | highlighted as problematic in Yao et al. 2009 |
| DQ523643                | Fraumene et al. 2006        | H3x1                                    | highlighted as problematic in Yao et al. 2009 |
| DQ523647                | Fraumene et al. 2006        | H3u                                     | highlighted as problematic in Yao et al. 2009 |
| DQ523649                | Fraumene et al. 2006        | T2b3a                                   | highlighted as problematic in Yao et al. 2009 |
| DQ523662                | Fraumene et al. 2006        | H3x1                                    | highlighted as problematic in Yao et al. 2009 |
| EF660936                | Gasparre et al. 2007        | HV1a'b'c                                | highlighted as problematic in Yao et al. 2009 |
| EF660956                | Gasparre et al. 2007        | H13b1                                   | highlighted as problematic in Yao et al. 2009 |
| GU733719                | Gunnarsdottir et al. 2011   | M74b1                                   | 2nd generation sequencing data                |
| GU733724                | Gunnarsdottir et al. 2011   | B4b1a2c                                 | 2nd generation sequencing data                |
| GU733734                | Gunnarsdottir et al. 2011   | M74b1                                   | 2nd generation sequencing data                |
| GU733737                | Gunnarsdottir et al. 2011   | R9b1a1                                  | 2nd generation sequencing data                |
| GU733740                | Gunnarsdottir et al. 2011   | N11b                                    | 2nd generation sequencing data                |
| GU733744                | Gunnarsdottir et al. 2011   | B4b1a2c                                 | 2nd generation sequencing data                |
| GU733776                | Gunnarsdottir et al. 2011   | N11b                                    | 2nd generation sequencing data                |
| GU733790                | Gunnarsdottir et al. 2011   | B4b1a2b                                 | 2nd generation sequencing data                |
| GU733814                | Gunnarsdottir et al. 2011   | B4b1a2d                                 | 2nd generation sequencing data                |
| GU733815                | Gunnarsdottir et al. 2011   | B4b1a2b                                 | 2nd generation sequencing data                |
| GU733825                | Gunnarsdottir et al. 2011   | B4b1a2d                                 | 2nd generation sequencing data                |
| HM596670                | Gunnarsdottir et al. 2011   | M26                                     | 2nd generation sequencing data                |
| HM596703                | Gunnarsdottir et al. 2011   | N9a6                                    | 2nd generation sequencing data                |
| HM596710                | Gunnarsdottir et al. 2011   | M26                                     | 2nd generation sequencing data                |
| HM852761                | Schönberg et al. 2011       | HV1a1                                   | 2nd generation sequencing data                |
| HM852777                | Schönberg et al. 2011       | U7a4                                    | 2nd generation sequencing data                |
| HM852790                | Schönberg et al. 2011       | U1a                                     | 2nd generation sequencing data                |
| HM852797                | Schönberg et al. 2011       | U3c                                     | 2nd generation sequencing data                |
| HM852803                | Schönberg et al. 2011       | U3c                                     | 2nd generation sequencing data                |
| HM852823                | Schönberg et al. 2011       | U7a4                                    | 2nd generation sequencing data                |
| HM852844                | Schönberg et al. 2011       | U1a'c                                   | 2nd generation sequencing data                |

**References:**

- Fraumene,C., Belle,E.M., Castri,L., Sanna,S., Mancosu,G., Cosso,M., Marras,F., Barbujani,G., Pirastu,M. and Angius,A., High resolution analysis and phylogenetic network construction using complete mtDNA sequences in sardinian genetic isolates, *Mol. Biol. Evol.* 23 (11), 2101-2111 (2006)
- Gasparre,G., Porcelli,A.M., Bonora,E., Pennisi,L.F., Toller,M., Iommarini,L., Ghelli,A., Moretti,M., Betts,C.M., Martinelli,G.N., Ceroni,A.R., Curcio,F., Carelli,V., Rugolo,M., Tallini,G. and Romeo,G., Disruptive mitochondrial DNA mutations in complex I subunits are markers of oncocytic phenotype in thyroid tumors, *Proc. Natl. Acad. Sci. U.S.A.* 104 (21), 9001-9006 (2007)
- Gunnarsdottir,E.D., Li,M., Bauchet,M., Finstermeier,K. and Stoneking,M., High-throughput sequencing of complete human mtDNA genomes from the Philippines, *Genome Res.* 21 (1), 1-11 (2011)
- Ingman,M., Kaessmann,H., Paabo,S. and Gyllensten,U., Mitochondrial genome variation and the origin of modern humans, *Nature* 408 (6813), 708-713 (2000)
- Schönberg A, Theunert C, Li M, Stoneking M, Nasidze I., High-throughput sequencing of complete human mtDNA genomes from the Caucasus and West Asia: high diversity and demographic inferences, *Eur J Hum Genet.* 19 (9), 988-94 (2011)
