# Supplementary material for: Concept for estimating mitochondrial DNA haplogroups using a maximum likelihood approach (EMMA)
Source: PubMed Central journal article supplement — Forensic Sci Int Genet. 2013 Dec;7(6):601–9. doi: 10.1016/j.fsigen.2013.07.005 (PMC3819997; doi:10.1016/j.fsigen.2013.07.005), 2013-12
Supplement: mmc2.pdf [file mmc2.pdf]

**ESM2: 19,171 full control region haplotypes grouped into discernable control region haplogroup clusters (CR-HGs)**

Samples that were assigned to different haplogroups are split equally into the respective CR-HGs.

| <b>CR-HG</b>    | <b>number of samples</b> |
|-----------------|--------------------------|
| CR-L            | 0                        |
| CR-L0           | 1                        |
| CR-L0a          | 17                       |
| CR-L0a1'4       | 13,5                     |
| CR-L0a1a        | 72                       |
| CR-L0a1b        | 44,5                     |
| CR-L0a1c        | 5                        |
| CR-L0a1d        | 13                       |
| CR-L0a2         | 60                       |
| CR-L0a3         | 0                        |
| CR-L0a4         | 0                        |
| CR-L0f          | 22                       |
| CR-L0k          | 0                        |
| CR-L0k1         | 35                       |
| CR-L0k2         | 0                        |
| CR-L0d          | 80                       |
| CR-L1'2'3'4'5'6 | 0                        |
| CR-L1b          | 338                      |
| CR-L1b2         | 13                       |
| CR-L1c          | 13                       |
| CR-L1c1         | 110                      |
| CR-L1c2         | 97                       |
| CR-L1c3         | 121                      |
| CR-L1c4         | 12                       |
| CR-L1c5         | 0                        |
| CR-L5           | 11                       |
| CR-L2'3'4'6     | 0                        |
| CR-L2           | 1                        |
| CR-L2a          | 5                        |
| CR-L2a1'2'3'4   | 38                       |
| CR-L2a1         | 485                      |
| CR-L2a1a1       | 33                       |
| CR-L2a1a2       | 56,5                     |
| CR-L2a1a3       | 29,8                     |
| CR-L2a1g        | 0                        |
| CR-L2a1d        | 5                        |
| CR-L2a1i        | 32,5                     |
| CR-L2a1k        | 0                        |
| CR-L2a1l        | 43,2                     |
| CR-L2a2'3'4     | 9                        |
| CR-L2b'c        | 0                        |
| CR-L2b          | 65                       |
| CR-L2b1         | 71                       |
| CR-L2c          | 49                       |
| CR-L2c1         | 11                       |
| CR-L2c2         | 65                       |
| CR-L2c3         | 28                       |
| CR-L2d          | 28                       |
| CR-L2e          | 23                       |
| CR-L6           | 2                        |
| CR-L3'4         | 0                        |

|           |       |
|-----------|-------|
| CR-L4     | 20    |
| CR-L4b2   | 51    |
| CR-L3     | 13    |
| CR-L3a    | 7,5   |
| CR-L3b    | 210,2 |
| CR-L3b2   | 39    |
| CR-L3b3   | 6,3   |
| CR-L3f    | 20    |
| CR-L3f1b  | 204,5 |
| CR-L3f2   | 10,5  |
| CR-L3d    | 180,5 |
| CR-L3d2   | 26,5  |
| CR-L3d4   | 26,5  |
| CR-L3e1   | 86,5  |
| CR-L3e1a  | 39    |
| CR-L3e1a1 | 22    |
| CR-L3e1b  | 23    |
| CR-L3e1d  | 10    |
| CR-L3e2   | 23    |
| CR-L3e2a1 | 91    |
| CR-L3e2b  | 180   |
| CR-L3e3   | 81    |
| CR-L3e4   | 27    |
| CR-L3e5   | 28    |
| CR-L3i2   | 6     |
| CR-L3k    | 5     |
| CR-L3x    | 14    |
| CR-L3h1   | 37    |
| CR-L3h2   | 10    |
| CR-M      | 391,4 |
| CR-M1     | 29    |
| CR-M1a1   | 62    |
| CR-M1a3   | 11    |
| CR-M1b1   | 5     |
| CR-M1b2   | 8     |
| CR-M2     | 7     |
| CR-M20    | 16    |
| CR-M3     | 60    |
| CR-M4     | 15    |
| CR-M65    | 10    |
| CR-M67    | 0     |
| CR-M18'38 | 8     |
| CR-M30    | 44    |
| CR-M45    | 0     |
| CR-M63    | 0     |
| CR-M64    | 0     |
| CR-M66    | 0     |
| CR-M5     | 43,2  |
| CR-M6     | 7     |
| CR-M7a    | 26,5  |
| CR-M7b    | 38    |
| CR-M7b1   | 87,5  |
| CR-M7b2   | 26,5  |
| CR-M7b4   | 18    |
| CR-M7b3   | 6     |
| CR-M7c    | 35    |

|             |       |
|-------------|-------|
| CR-M7c1b    | 5     |
| CR-M7c3b    | 13    |
| CR-M7c3c    | 79    |
| CR-M7g      | 0     |
| CR-M7e      | 10    |
| CR-M7f      | 0     |
| CR-M8       | 27    |
| CR-CZ       | 0     |
| CR-C        | 214,5 |
| CR-C1       | 80    |
| CR-C1a      | 4     |
| CR-C1b      | 181,2 |
| CR-C1b2     | 37    |
| CR-C1b4     | 29    |
| CR-C1b8     | 5,5   |
| CR-C1b10    | 12,5  |
| CR-C1b11    | 20,8  |
| CR-C1c1     | 22    |
| CR-C1c3     | 0     |
| CR-C1c4     | 6,5   |
| CR-C1c5     | 12    |
| CR-C1c6     | 10,5  |
| CR-C1c7     | 5     |
| CR-C1d      | 87    |
| CR-C1e      | 0     |
| CR-C4a2'3'4 | 32    |
| CR-C4b1     | 16,5  |
| CR-C4b2     | 0     |
| CR-C4b3     | 10    |
| CR-C4c2     | 30    |
| CR-C5       | 10    |
| CR-C5a      | 17    |
| CR-C5b1     | 15    |
| CR-Z        | 34    |
| CR-M9a'b    | 23    |
| CR-E        | 18,3  |
| CR-E1a1a    | 67    |
| CR-E1a2     | 8     |
| CR-E2       | 15    |
| CR-M10      | 26    |
| CR-M11      | 5     |
| CR-M12      | 18    |
| CR-G1a1     | 22,9  |
| CR-G1a2'3   | 5     |
| CR-G2a      | 61    |
| CR-G2c      | 0     |
| CR-G3       | 11    |
| CR-G4       | 0     |
| CR-M13a     | 5     |
| CR-M46      | 0     |
| CR-M14      | 0     |
| CR-M15      | 0     |
| CR-M19      | 0     |
| CR-M53      | 0     |
| CR-M21a     | 5     |
| CR-M21c     | 0     |

|           |      |
|-----------|------|
| CR-M23    | 5    |
| CR-M24    | 0    |
| CR-M26    | 0    |
| CR-M27a   | 0    |
| CR-M27b   | 0    |
| CR-M27c   | 0    |
| CR-M28    | 0    |
| CR-M29    | 0    |
| CR-Q      | 48   |
| CR-M31a1  | 0    |
| CR-M31a2  | 0    |
| CR-M31b'c | 0    |
| CR-M32    | 4    |
| CR-M56    | 0    |
| CR-M35c   | 0    |
| CR-M70    | 0    |
| CR-M62    | 0    |
| CR-M74    | 15   |
| CR-M44    | 0    |
| CR-M47    | 0    |
| CR-M48    | 0    |
| CR-M50    | 0    |
| CR-M52    | 0    |
| CR-M58    | 0    |
| CR-M60b   | 0    |
| CR-M71    | 24   |
| CR-M72    | 0    |
| CR-M76    | 4    |
| CR-M80    | 0    |
| CR-D1     | 108  |
| CR-D1f    | 23   |
| CR-D1g    | 26,5 |
| CR-D1h    | 22   |
| CR-D1i    | 12   |
| CR-D1j    | 0    |
| CR-D4a    | 63   |
| CR-D4b1   | 37,7 |
| CR-D4b2d  | 0    |
| CR-D4c    | 32   |
| CR-D4d    | 0    |
| CR-D4e1a  | 11   |
| CR-D2     | 10   |
| CR-D4g1   | 15   |
| CR-D4g2   | 11   |
| CR-D4h3   | 16   |
| CR-D4i    | 15   |
| CR-D4k    | 4    |
| CR-D4o    | 11   |
| CR-D4l    | 13   |
| CR-D4q    | 6    |
| CR-D4t    | 0    |
| CR-D5     | 57,5 |
| CR-D5b    | 46   |
| CR-D5c    | 13   |
| CR-D6     | 7    |
| CR-N      | 50   |

|             |       |
|-------------|-------|
| CR-N1a      | 19    |
| CR-N1a1     | 12    |
| CR-N1a2     | 0     |
| CR-N1a3     | 0     |
| CR-I        | 92    |
| CR-I1       | 57    |
| CR-I2'3     | 35    |
| CR-I3       | 18    |
| CR-N1b      | 73    |
| CR-N1b1     | 5     |
| CR-N1b2     | 25    |
| CR-W        | 166   |
| CR-W4       | 30    |
| CR-W6       | 44    |
| CR-W7       | 0     |
| CR-N3       | 0     |
| CR-N9a      | 14,5  |
| CR-N9a1'3   | 13    |
| CR-N9a2'4'5 | 21    |
| CR-N9a6     | 9,5   |
| CR-N9a7     | 0     |
| CR-Y        | 0     |
| CR-Y1       | 23    |
| CR-Y2       | 14    |
| CR-N10      | 15    |
| CR-N11b     | 0     |
| CR-N13      | 0     |
| CR-N21      | 7     |
| CR-N22      | 6     |
| CR-A        | 25    |
| CR-A4       | 75    |
| CR-A2       | 723,2 |
| CR-A2e      | 12,3  |
| CR-A2g      | 30,3  |
| CR-A2h      | 52    |
| CR-A2i      | 25,5  |
| CR-A2p      | 43,2  |
| CR-A2q      | 42,3  |
| CR-A2u      | 19    |
| CR-A2v      | 23,8  |
| CR-A2ab     | 4     |
| CR-A2ac     | 15    |
| CR-A2ad     | 4     |
| CR-A2ae     | 7,3   |
| CR-A2af     | 0     |
| CR-A2s      | 0     |
| CR-A2z      | 18    |
| CR-A7       | 0     |
| CR-A11      | 10    |
| CR-A5a      | 16    |
| CR-A5b1     | 0     |
| CR-A8       | 22    |
| CR-A10      | 0     |
| CR-O        | 0     |
| CR-S1       | 0     |
| CR-S3       | 0     |

|           |       |
|-----------|-------|
| CR-S4     | 0     |
| CR-S5     | 0     |
| CR-X      | 9     |
| CR-X1     | 15    |
| CR-X2     | 91    |
| CR-X2a    | 18    |
| CR-X2j    | 0     |
| CR-X2b1   | 36    |
| CR-X2d    | 18    |
| CR-X2c    | 33    |
| CR-X2e1   | 11    |
| CR-X2e2   | 0     |
| CR-X2i    | 0     |
| CR-X2m'n  | 0     |
| CR-X2m    | 0     |
| CR-X2n    | 0     |
| CR-X4     | 5     |
| CR-R      | 155,2 |
| CR-R0     | 2183  |
| CR-R0a    | 78    |
| CR-R0a1a  | 37    |
| CR-R0a2c  | 18    |
| CR-R0a2f1 | 0     |
| CR-R0a2i  | 6     |
| CR-R0a2k1 | 0     |
| CR-R0a4   | 0     |
| CR-R0b    | 0     |
| CR-HV0    | 316   |
| CR-HV0a1  | 8     |
| CR-V5     | 0     |
| CR-V7     | 23    |
| CR-V9     | 6     |
| CR-V18    | 0     |
| CR-V19    | 0     |
| CR-V21    | 0     |
| CR-HV0b   | 9     |
| CR-HV1    | 61    |
| CR-HV2    | 13    |
| CR-HV4a   | 50,2  |
| CR-HV6    | 17    |
| CR-HV15   | 0     |
| CR-HV12a  | 8     |
| CR-HV13   | 15    |
| CR-H1a    | 42    |
| CR-H1a1   | 53    |
| CR-H1a3   | 49    |
| CR-H1a6   | 4     |
| CR-H1b    | 110   |
| CR-H1k    | 4     |
| CR-H1c    | 96    |
| CR-H1c1   | 41    |
| CR-H1c3   | 13    |
| CR-H1o    | 4     |
| CR-H1x    | 0     |
| CR-H1af   | 6     |
| CR-H1ar   | 0     |

|           |     |
|-----------|-----|
| CR-H1au   | 0   |
| CR-H1ba   | 4   |
| CR-H1bs   | 4   |
| CR-H1bz   | 0   |
| CR-H2a1   | 75  |
| CR-H2a2b  | 35  |
| CR-H2a3   | 9   |
| CR-H3a    | 10  |
| CR-H3b1   | 4   |
| CR-H3c2   | 16  |
| CR-H3c3   | 0   |
| CR-H3h4   | 0   |
| CR-H3n    | 0   |
| CR-H3v    | 5   |
| CR-H3w    | 0   |
| CR-H3x    | 0   |
| CR-H3z    | 4   |
| CR-H3af   | 0   |
| CR-H3ak   | 0   |
| CR-H3am   | 0   |
| CR-H3an   | 0   |
| CR-H3av   | 0   |
| CR-H4b1   | 0   |
| CR-H5'36  | 6   |
| CR-H5     | 288 |
| CR-H5a3   | 12  |
| CR-H5a4   | 6   |
| CR-H5a5   | 0   |
| CR-H5b1   | 5   |
| CR-H5b2   | 0   |
| CR-H5b4   | 0   |
| CR-H5e    | 0   |
| CR-H5n    | 0   |
| CR-H5r    | 0   |
| CR-H5s    | 5   |
| CR-H5u    | 0   |
| CR-H36    | 7   |
| CR-H6     | 154 |
| CR-H6a1a6 | 0   |
| CR-H6a1a7 | 0   |
| CR-H6a1a8 | 0   |
| CR-H6a1b3 | 9   |
| CR-H6a1b4 | 5   |
| CR-H6b    | 14  |
| CR-H6c1   | 0   |
| CR-H7a1   | 34  |
| CR-H7a2   | 0   |
| CR-H7c1   | 10  |
| CR-H7d2   | 0   |
| CR-H7f    | 0   |
| CR-H7h    | 4   |
| CR-H8     | 18  |
| CR-H8a    | 0   |
| CR-H31a   | 0   |
| CR-H11    | 37  |
| CR-H11a   | 35  |

|           |       |
|-----------|-------|
| CR-H11a1  | 17    |
| CR-H11a3  | 0     |
| CR-H11a4  | 0     |
| CR-H10a1  | 16,5  |
| CR-H10d   | 0     |
| CR-H10g   | 0     |
| CR-H14a   | 25    |
| CR-H14b2  | 0     |
| CR-H15    | 51    |
| CR-H27    | 41,5  |
| CR-H20    | 25    |
| CR-H21    | 0     |
| CR-H24    | 20    |
| CR-H28    | 12    |
| CR-H39    | 16    |
| CR-H57    | 0     |
| CR-H74    | 0     |
| CR-H77    | 0     |
| CR-H82    | 6     |
| CR-R1     | 7     |
| CR-R2     | 29    |
| CR-J      | 5     |
| CR-J1     | 19    |
| CR-J1b    | 96    |
| CR-J1b1a  | 80    |
| CR-J1b1b  | 23    |
| CR-J1b7   | 0     |
| CR-J1c    | 251   |
| CR-J1c1   | 57    |
| CR-J1c2   | 143   |
| CR-J1c13  | 0     |
| CR-J1c16  | 0     |
| CR-J1d    | 39    |
| CR-J2a    | 34    |
| CR-J2a1a  | 10    |
| CR-J2a1a1 | 57    |
| CR-J2a1a2 | 0     |
| CR-J2a2a  | 19    |
| CR-J2a2c  | 0     |
| CR-J2b    | 21    |
| CR-J2b1a  | 49    |
| CR-J2b1h  | 0     |
| CR-T      | 31    |
| CR-T1     | 11,5  |
| CR-T1a    | 222   |
| CR-T1a1'3 | 16    |
| CR-T1a4   | 0     |
| CR-T1a11  | 0     |
| CR-T1a12  | 0     |
| CR-T1a13  | 0     |
| CR-T1a7   | 0     |
| CR-T1a9   | 0     |
| CR-T1b    | 13    |
| CR-T2     | 197,5 |
| CR-T2a1b  | 34    |
| CR-T2b    | 309   |



|            |       |
|------------|-------|
| CR-T2c1    | 16    |
| CR-T2d1a   | 0     |
| CR-T2d1b   | 0     |
| CR-T2e     | 38    |
| CR-T2e1    | 17    |
| CR-T2e5    | 0     |
| CR-T2e6    | 0     |
| CR-T2f1    | 15    |
| CR-T2i     | 0     |
| CR-T2j     | 0     |
| CR-T2k     | 0     |
| CR-R5      | 19    |
| CR-R7      | 0     |
| CR-R8b     | 0     |
| CR-R9      | 14    |
| CR-R9b1    | 32    |
| CR-R9b2    | 11    |
| CR-R9c     | 54    |
| CR-R9c1    | 27    |
| CR-F1a'c'f | 8     |
| CR-F1a     | 81    |
| CR-F1a1    | 46    |
| CR-F1a1a   | 73    |
| CR-F1a1d   | 20    |
| CR-F1a4a   | 43    |
| CR-F1a2    | 5,5   |
| CR-F1a3a   | 32,5  |
| CR-F1b     | 58    |
| CR-F1b1a   | 8     |
| CR-F1e1a   | 0     |
| CR-F1e2    | 0     |
| CR-F2a     | 12    |
| CR-F2b1    | 0     |
| CR-F2c2    | 0     |
| CR-F2d     | 4     |
| CR-F3      | 0     |
| CR-F3a     | 25    |
| CR-F3b     | 7     |
| CR-F4a     | 5     |
| CR-R11     | 7     |
| CR-R11b1   | 0     |
| CR-B4      | 169,5 |
| CR-B4a1a1a | 67    |
| CR-B4a1c3  | 7     |
| CR-B4a2a   | 0     |
| CR-B4g     | 19    |
| CR-B4h     | 0     |
| CR-B4b     | 399   |
| CR-B2a     | 84,5  |
| CR-B2g     | 22    |
| CR-B2i1    | 0     |
| CR-B2k     | 0     |
| CR-B4b1    | 55    |
| CR-B4b1a1  | 16    |
| CR-B4b1b'c | 11    |
| CR-B4e     | 0     |

|            |     |
|------------|-----|
| CR-B4c1b   | 51  |
| CR-B4c1b1  | 0   |
| CR-B4c1c   | 11  |
| CR-B4c2    | 20  |
| CR-B4f     | 0   |
| CR-B5      | 0   |
| CR-B5a     | 106 |
| CR-B5b     | 55  |
| CR-R24     | 4   |
| CR-R12'21  | 0   |
| CR-R23     | 0   |
| CR-R30b    | 4   |
| CR-R31b    | 0   |
| CR-P1      | 5   |
| CR-P2      | 0   |
| CR-P10     | 0   |
| CR-P8      | 0   |
| CR-P3      | 0   |
| CR-P4a     | 0   |
| CR-P4b     | 0   |
| CR-P5      | 0   |
| CR-P6      | 0   |
| CR-P7      | 0   |
| CR-P9      | 2   |
| CR-U1      | 0   |
| CR-U1a'c   | 62  |
| CR-U1b     | 18  |
| CR-U5      | 0   |
| CR-U5a     | 25  |
| CR-U5a1    | 207 |
| CR-U5a1b1  | 57  |
| CR-U5a1b3  | 5   |
| CR-U5a1c   | 11  |
| CR-U5a1h   | 6   |
| CR-U5a2    | 47  |
| CR-U5a2a   | 29  |
| CR-U5a2e   | 9   |
| CR-U5b     | 161 |
| CR-U5b1b1a | 21  |
| CR-U5b1b1b | 11  |
| CR-U5b1c1  | 4   |
| CR-U5b1c2  | 7   |
| CR-U5b1e1  | 4   |
| CR-U5b1h   | 0   |
| CR-U5b1f   | 0   |
| CR-U5b1i   | 0   |
| CR-U5b2a1  | 37  |
| CR-U5b2a2  | 23  |
| CR-U5b2b1b | 0   |
| CR-U5b2c2b | 0   |
| CR-U5b3    | 9   |
| CR-U6      | 13  |
| CR-U6a     | 75  |
| CR-U6b1    | 5   |
| CR-U6d1    | 0   |
| CR-U2      | 21  |

|             |       |
|-------------|-------|
| CR-U2a      | 11    |
| CR-U2b      | 31    |
| CR-U2c'd    | 8     |
| CR-U2e      | 12    |
| CR-U2e1     | 108   |
| CR-U3       | 74    |
| CR-U3a      | 50    |
| CR-U3a2     | 8     |
| CR-U3b3     | 10    |
| CR-U4'9     | 1     |
| CR-U4       | 142   |
| CR-U4a1     | 43    |
| CR-U4a2     | 58    |
| CR-U4a3     | 8     |
| CR-U4b2     | 5     |
| CR-U4b3     | 5     |
| CR-U4c2a    | 0     |
| CR-U9a      | 9     |
| CR-U7       | 103   |
| CR-U7a      | 19    |
| CR-U7b1     | 0     |
| CR-U8a      | 24    |
| CR-U8b1     | 23    |
| CR-K        | 168,8 |
| CR-K1a      | 292,7 |
| CR-K1a1b1a  | 53,5  |
| CR-K1a1b2b  | 0     |
| CR-K1a4a1a2 | 8     |
| CR-K1a4a1b2 | 0     |
| CR-K1a4a1g  | 0     |
| CR-K1a4b    | 10    |
| CR-K1a7     | 4     |
| CR-K1a8     | 7,5   |
| CR-K1a9     | 16    |
| CR-K1a10    | 5     |
| CR-K1a11    | 29    |
| CR-K1a17    | 0     |
| CR-K1a20    | 0     |
| CR-K1a27    | 0     |
| CR-K1b1a    | 25    |
| CR-K1b1c    | 10    |
| CR-K1b2     | 28    |
| CR-K1c      | 74    |
| CR-K1c1e    | 0     |
| CR-K1c2     | 22    |
| CR-K1e      | 0     |
| CR-K2a5     | 13    |
| CR-K2a8     | 11    |
| CR-K2b1a    | 5     |
| CR-K2c      | 0     |
| CR-K3       | 1     |
