# Supplementary material for: Concept for estimating mitochondrial DNA haplogroups using a maximum likelihood approach (EMMA)
Source: PubMed Central journal article supplement — Forensic Sci Int Genet. 2013 Dec;7(6):601–9. doi: 10.1016/j.fsigen.2013.07.005 (PMC3819997; doi:10.1016/j.fsigen.2013.07.005), 2013-12
Supplement: mmc4.pdf [file mmc4.pdf]

**ESM4: Example genomes from Phylotree Build 15 where the haplogroup estimate of EMMA differed from Phylotree's haplogroup assignment**

| <b>Accession number</b> | <b>Publication</b>     | <b>Haplogroup by EMMA</b> | <b>Haplogroup by Phylotree Build 15</b> | <b>Reason for differing haplogroup assignment</b>                                    | <b>Comment</b>                        | <b>Differences to the rCRS</b>                                                                                                                                                                                                                           |
|-------------------------|------------------------|---------------------------|-----------------------------------------|--------------------------------------------------------------------------------------|---------------------------------------|----------------------------------------------------------------------------------------------------------------------------------------------------------------------------------------------------------------------------------------------------------|
| EU219921                | FTDNA                  | K1a1                      | K1a4                                    | G11914A and T16093C for haplogroup K1a1 present, but T11485C for K1a4 too            |                                       | 16093C 16224C 16311C 16519C 73G 150T 263G 264T 309.1C 315.1C 497T 750G 1189C 1438G 1811G 2706G 3480G 4769G 6518T 7028T 8860G 9055A 9698C 10398G 10550G 10961T 11299C 11467G 11485C 11719A 11914A 12308G 12372A 13681G 14167T 14766T 14798C 15326G 15613G |
| EU545420                | Malyarchuk et al. 2008 | HV10                      | HV9-152                                 | C13449T for haplogroup HV10 present, but G8994A and T152C for haplogroup HV9-152 too |                                       | 16093C 16104T 16311C 152C 263G 309.1C 309.2C 315.1C 750G 1438G 2706G 4769G 7028T 8860G 8994A 13449T 15169G 15326G                                                                                                                                        |
| JQ704528                | Behar et al. 2012      | H3-73                     | H3ap                                    | A73G for haplogroup H3-73 present, but T10915C for haplogroup H3ap too               |                                       | 16519C 73G 199C 263G 309.1C 315.1C 750G 1438G 4769G 5785C 6465A 6776C 8860G 10915C 15326G                                                                                                                                                                |
| AY922257                | Sun et al. 2006        | M30c1                     | M30c1a1                                 | C16069T for haplogroup M30c1a missing but G9966A for haplogroup M30c1a1 present      | missing C16069T confirmed by QP Kong  | 16166DEL 16223T 16519C 73G 146C 195A 263G 309.1C 315.1C 489C 523DEL 524DEL 750G 1438G 2706G 4769G 7028T 8701G 8860G 9540C 9653C 9966A 10398G 10400T 10873C 11719A 12007A 12234G 12705T 12945C 14766T 14783C 15043A 15301A 15326G 15431A                  |
| HQ873519                | Soares et al. 2011     | B4a1a1                    | B4a1a1a1                                | A16247G for haplogroup B4a1a1a missing                                               | missing A16247G confirmed by P Soares | 16148T 16189C 16217C 16261T 16519C 73G 146C 263G 523DEL 524DEL 750G 1438G 2706G 4769G 5465C 6719C 6905G 7028T 8281DEL 8282DEL 8283DEL 8284DEL 8285DEL 8286DEL 8287DEL 8288DEL 8289DEL 8860G 9123A 10238C 11719A 12239T 14022G 14766T 15326G 15746G       |
| JQ797975                | Pala et al. 2012       | T1                        | T1a10                                   | C16186T for haplogroup T1a missing, but G3337A for haplogroup T1a10 present          | missing C16186T confirmed by M Pala   | 16126C 16163G 16294T 16519C 73G 263G 309.1C 315.1C 709A 750G 1438G 1888A 2706G 3337A 4216C 4769G 4917G 7028T 8431T 8697A 8860G 10463C 11251G 11719A 12633A 12693G 13368A 13788A 14766T 14905A 15326G 15452A 15607G 15928A                                |

## References:

Behar,D.M., van Oven,M., Rosset,S., Metspalu,M., Loogvali,E.L., Silva,N.M., Kivisild,T., Torroni,A. and Villems,R., A 'Copernican' reassessment of the human mitochondrial DNA tree from its root, *Am. J. Hum. Genet.* 90 (4), 675-684 (2012)

Malyarchuk,B., Grzybowski,T., Derenko,M., Perkova,M., Vanecek,T., Lazur,J., Gomolcak,P. and Tsybovsky,I., Mitochondrial DNA phylogeny in Eastern and Western Slavs, *Mol. Biol. Evol.* 25 (8), 1651-1658 (2008)

Pala,M., Olivieri,A., Achilli,A., Accetturo,M., Metspalu,E., Reidla,M., Tamm,E., Karmin,M., Reisberg,T., Hooshiar Kashani,B., Perego,U.A., Carossa,V., Gandini,F., Pereira,J.B., Soares,P., Angerhofer,N., Rychkov,S., Al-Zahery,N., Carelli,V., Sanati,M.H., Houshmand,M., Hatina,J., Macaulay,V., Pereira,L., Woodward,S.R., Davies,W., Gamble,C., Baird,D., Semino,O., Villems,R., Torroni,A. and Richards,M.B., Mitochondrial DNA signals of late glacial recolonization of Europe from near eastern refugia, *Am. J. Hum. Genet.* 90 (5), 915-924 (2012)

Soares,P., Rito,T., Trejaut,J.A., Mormina,M., Hill,C., Tinkler-Hundel,E., Braid,M., Clarke,D.J., Loo,J.-H., Thomson,N., Denham,T., Donohue,M., Macaulay,V., Lin,M., Oppenheimer,S. and Richards,M.B., Ancient voyaging and polynesian origins, *Am. J. Hum. Genet.* 88 (2), 239-247 (2011)

Sun,C., Kong,Q.P., Palanichamy,M.G., Agrawal,S., Bandelt,H.J., Yao,Y.G., Khan,F., Zhu,C.L., Chaudhuri,T.K. and Zhang,Y.P., The dazzling array of basal branches in the mtDNA macrohaplogroup M from India as inferred from complete genomes, *Mol. Biol. Evol.* 23 (3), 683-690 (2006)
