# Supplementary material for: Concept for estimating mitochondrial DNA haplogroups using a maximum likelihood approach (EMMA)
Source: PubMed Central journal article supplement — Forensic Sci Int Genet. 2013 Dec;7(6):601–9. doi: 10.1016/j.fsigen.2013.07.005 (PMC3819997; doi:10.1016/j.fsigen.2013.07.005), 2013-12

ESM 6: Screenshot of sequence contig of sample FRE228 mistakenly containing a forward sequencing strand of sample FRE208

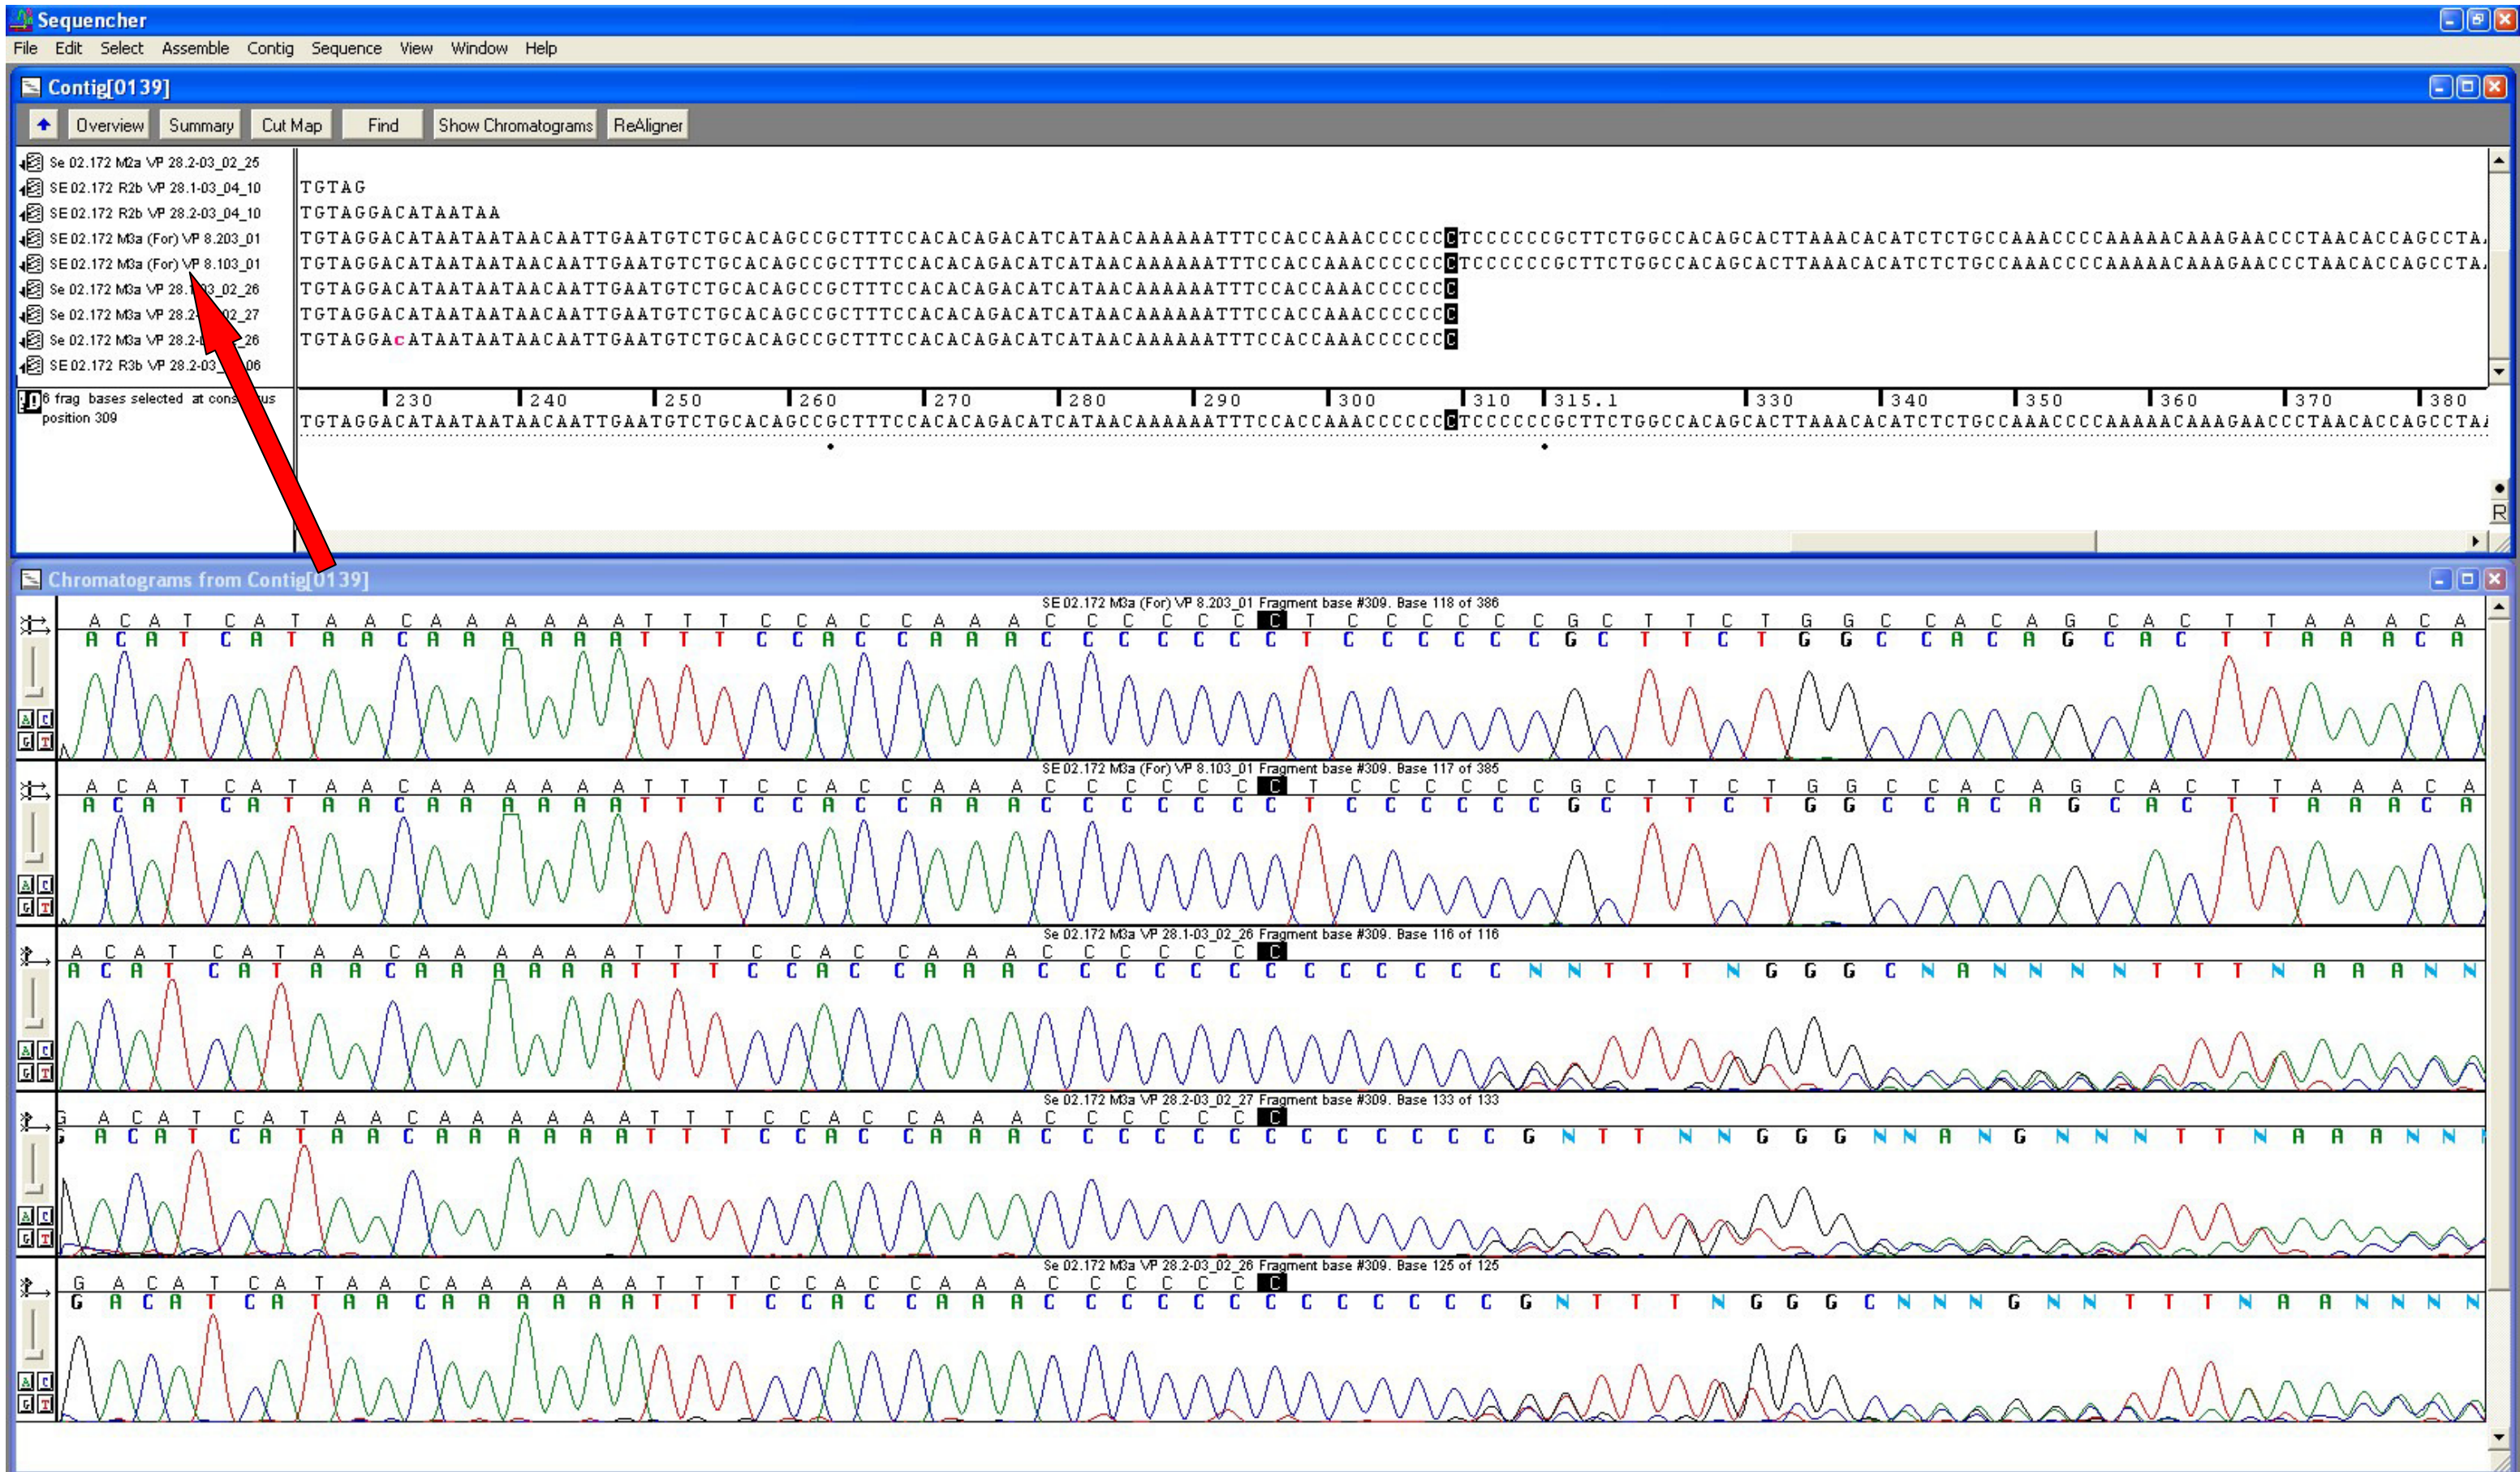

Supplement: mmc6.pdf [file mmc6.pdf]
